# Supplementary material
Source: MDPI journal article supplement (https://www.mdpi.com/2220-9964/10/2/69)

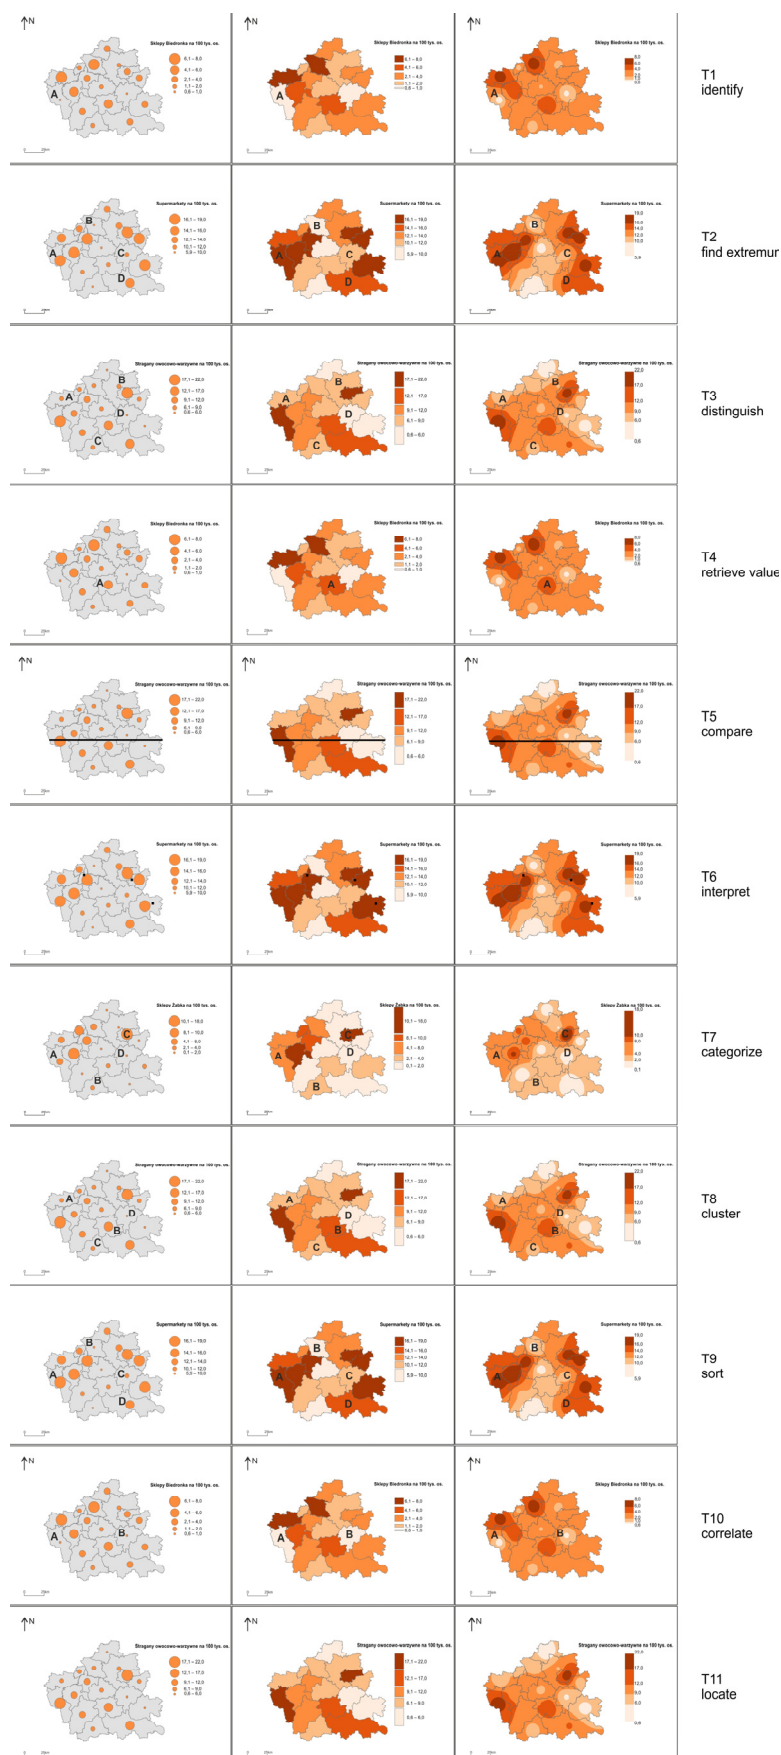

Figure S1. Maps used in the empirical study.

Supplement: s1 [file s1]
